# Supplementary material
Source: MDPI journal article supplement (https://www.mdpi.com/2073-4344/11/10/1207)
Supplement: s1 [file s1]

# What is the real state of single-atom catalysts under electrochemical conditions – from adsorption to surface Pourbaix Plots?

Tanja Đokić<sup>1</sup>, Ana S. Dobrota<sup>1</sup>, Natalia V. Skorodumova<sup>2</sup>, Slavko V. Mentus<sup>1,3</sup> and Igor A. Pašti<sup>1,2\*</sup>

<sup>1</sup> University of Belgrade – Faculty of Physical Chemistry, Studentski trg 12-16, 11000 Belgrade, Serbia

<sup>2</sup> Department of Materials Science and Engineering, School of Industrial Engineering and Management, KTH – Royal Institute of Technology, Brinellvägen 23, 100 44 Stockholm, Sweden

<sup>3</sup> Serbian Academy of Sciences and Arts, Knez Mihajlova 35, 11000 Belgrade, Serbia

\* Correspondence: igor@ffh.bg.ac.rs;

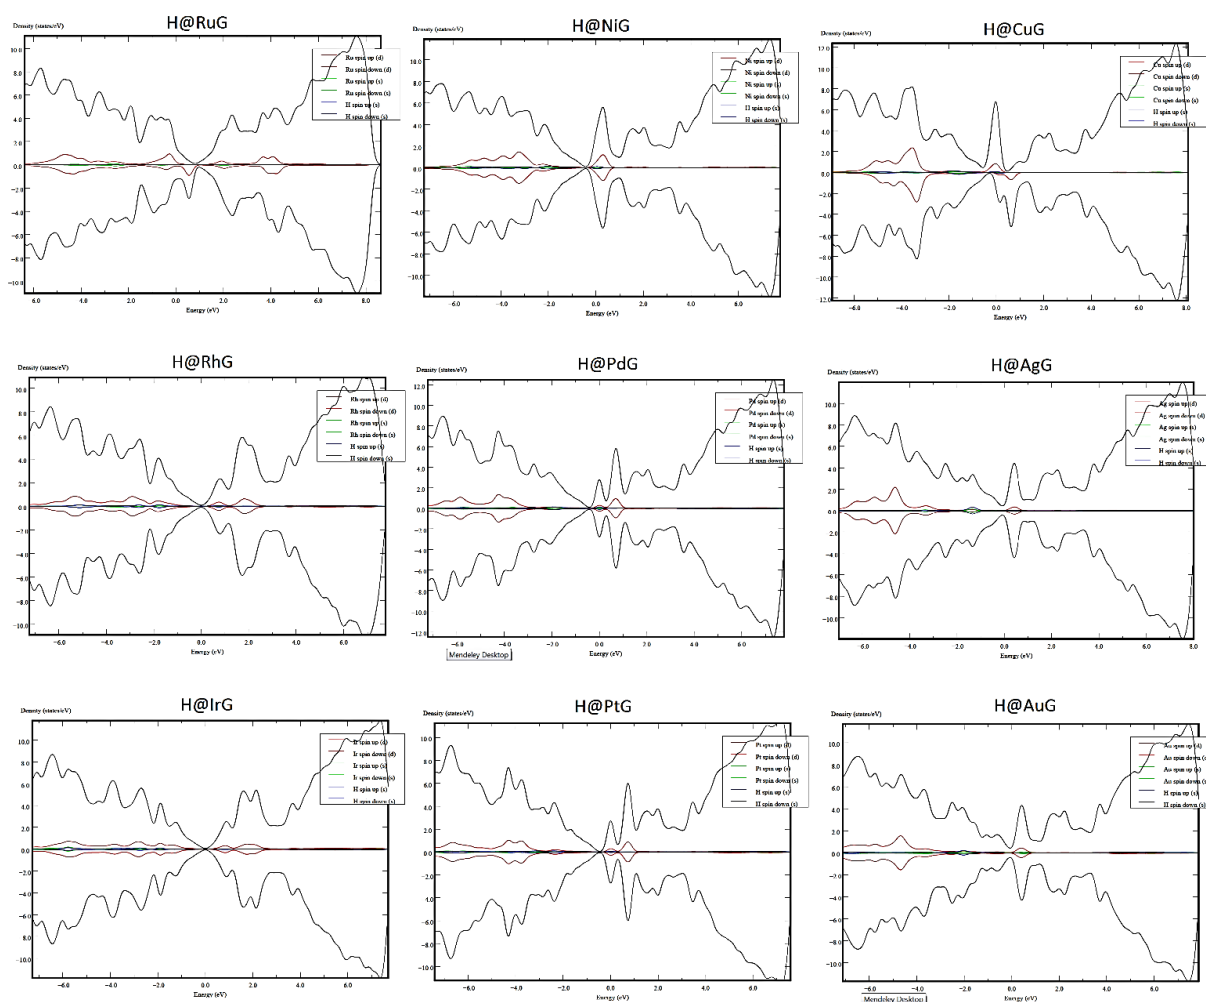

**Figure S1.** Densities of states for the investigated M@vG systems with adsorbed hydrogen. Total DOS, metal d- and s-states and H s-states are given.

# SUPPLEMENTARY INFORMATION

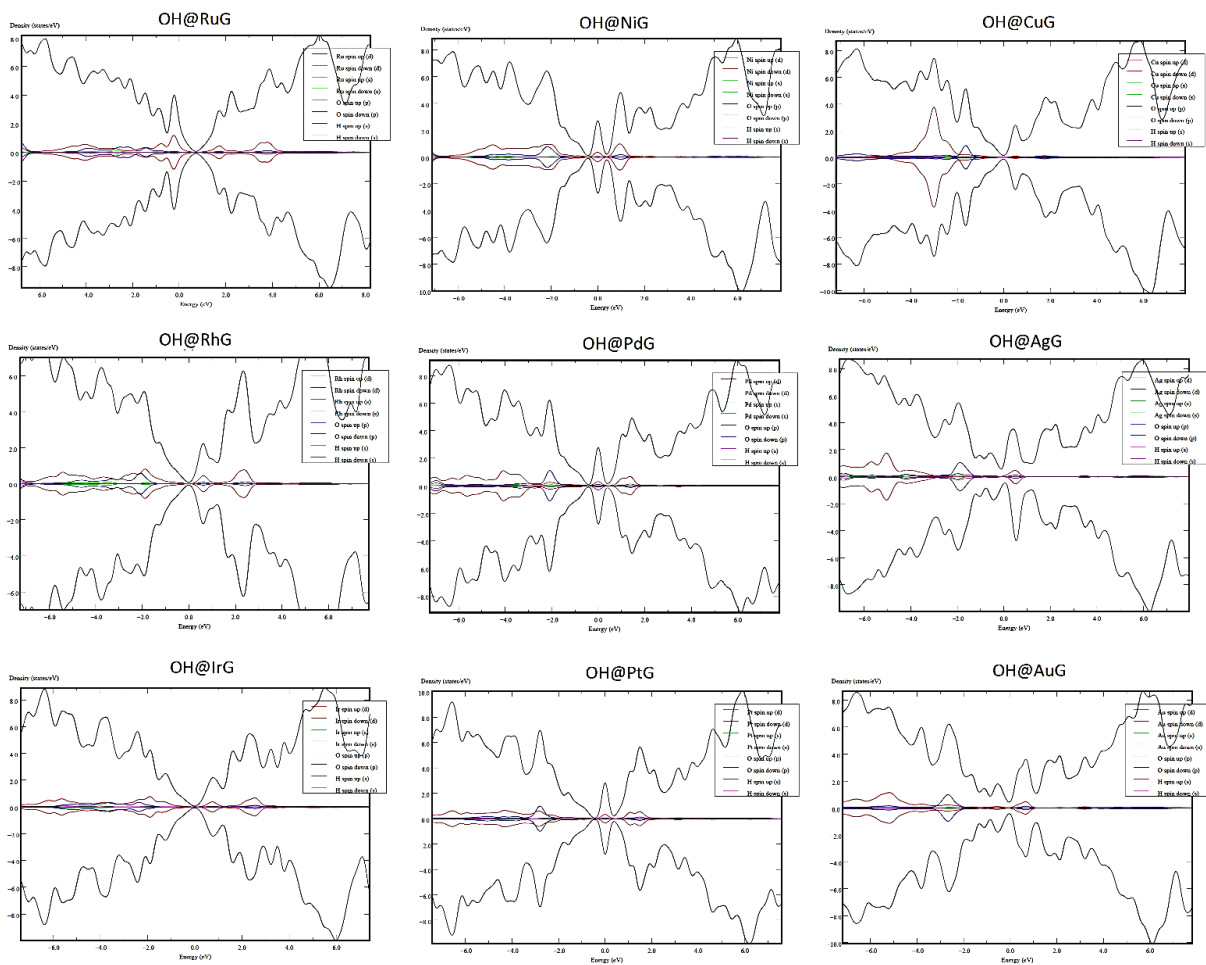

**Figure S2.** Densities of states for the investigated M@vG systems with adsorbed OH. Total DOS, metal d- and s-states, O p- and H s-states are given.

# SUPPLEMENTARY INFORMATION

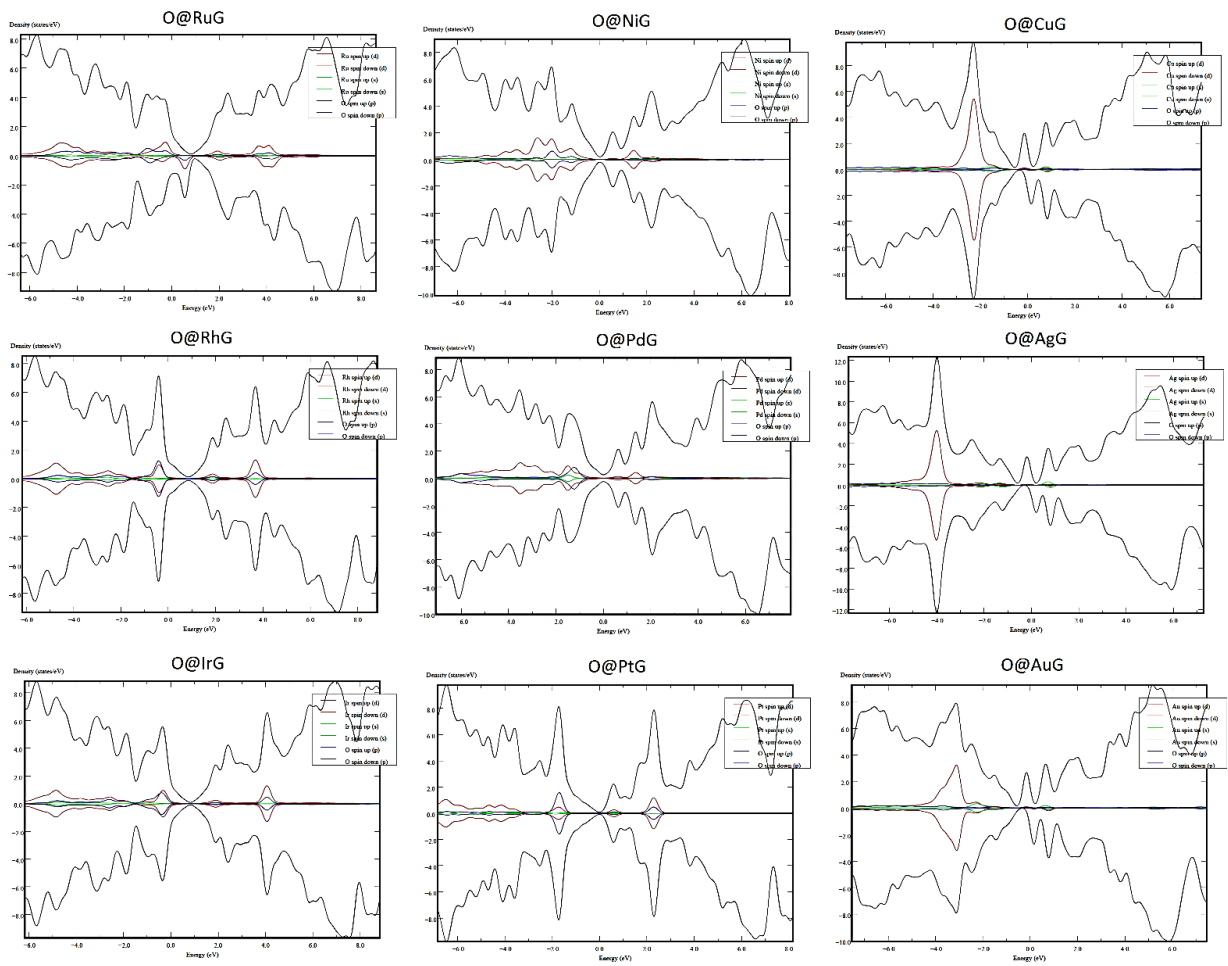

**Figure S3.** Densities of states for the investigated M@vG systems with adsorbed O. Total DOS, metal d- and s-states and O p-states are given.
